# Supplementary material
Source: Springer Nature journal article supplement (https://www.springermedizin.de/resource/supplementary/12906_2011_508_MOESM2_ESM.pdf/9519966)

**A** Mouse ileum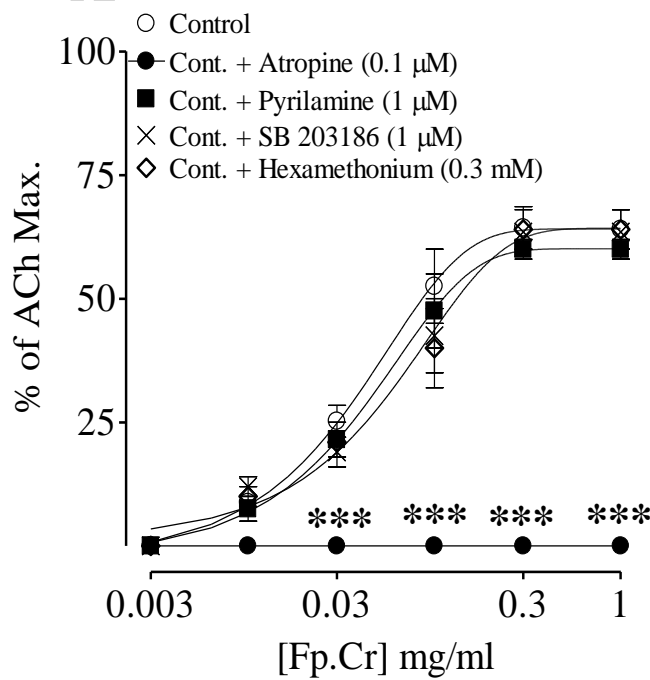**D** Mouse jejunum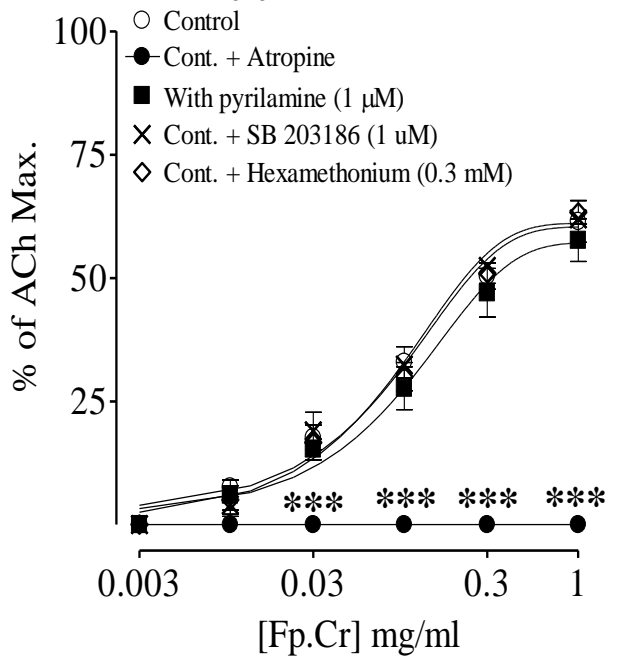**B** Guinea-pig ileum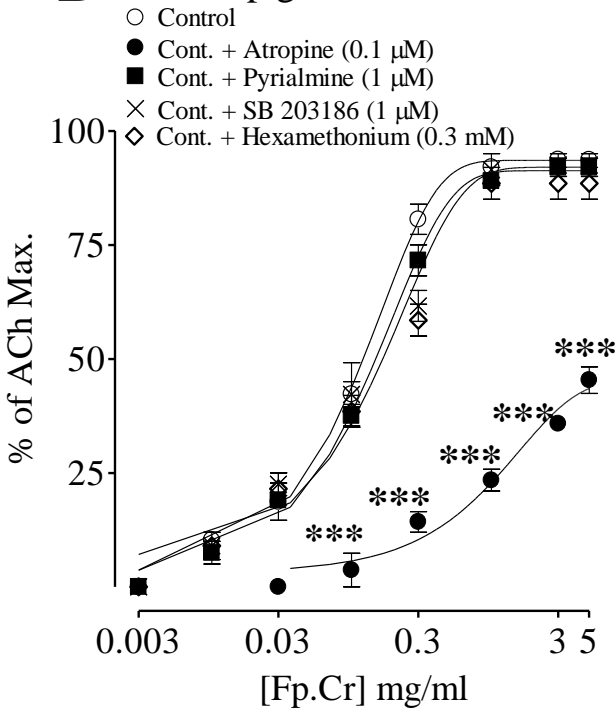**E** Guinea-pig jejunum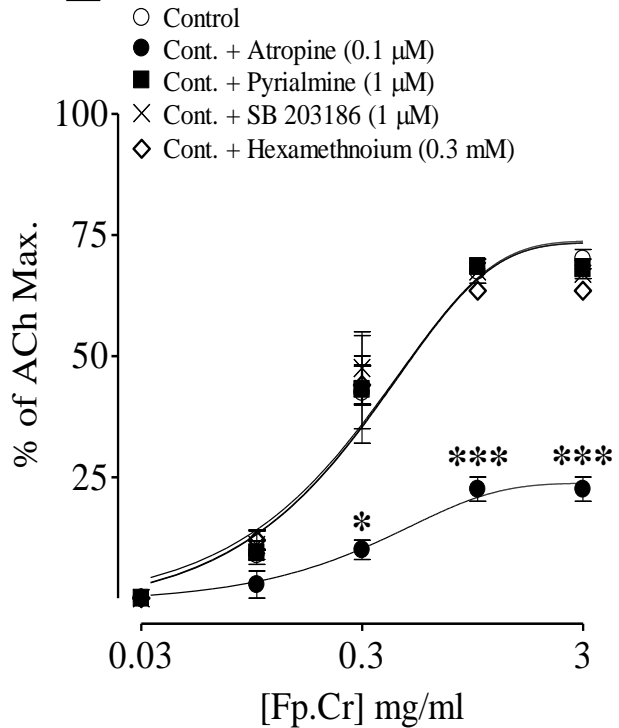**C** Rabbit ileum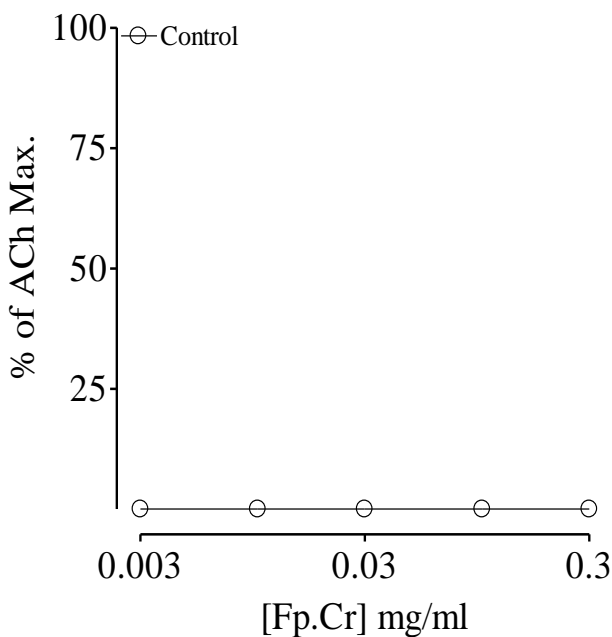**F** Rabbit jejunum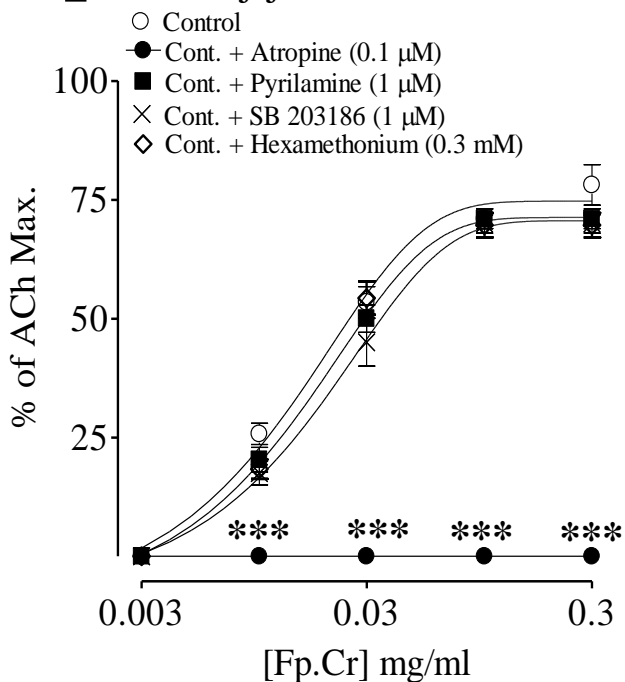

Supplement: MOESM2 [file 9519966]
